# Supplementary material for: Exposure to Tomographic Scans and Cancer Risks
Source: Oxford University Press journal article supplement (doi:10.1093/jncics/pkz072), 2019-09-08
Supplement: pkz072_supplementary_data.pdf [file pkz072_supplementary_data.pdf]

**Supplement Table 1 Primary diagnoses which are associated with treatment with high dose radiation exposure or ordering CT scan which indicated subsequent cancer.**

| Cancer Type            | Diagnosis                                                                                                                                                                                                                                                                                                                                                                                                                                  |
|------------------------|--------------------------------------------------------------------------------------------------------------------------------------------------------------------------------------------------------------------------------------------------------------------------------------------------------------------------------------------------------------------------------------------------------------------------------------------|
| THYROID CANCER         | <ul style="list-style-type: none"> <li>• Simple and unspecified goiter</li> <li>• Nontoxic nodular goiter</li> <li>• Thyrotoxicosis with or without goiter</li> <li>• Congenital hypothyroidism</li> <li>• Acquired hypothyroidism</li> <li>• Thyroiditis</li> </ul>                                                                                                                                                                       |
| LEUKEMIA               | <ul style="list-style-type: none"> <li>• Lymphosarcoma and reticulosarcoma and other specified malignant tumors of lymphatic tissue</li> <li>• Hodgkin's disease</li> <li>• Other malignant neoplasms of lymphoid and histiocytic tissue</li> <li>• Multiple myeloma and immunoproliferative neoplasms</li> <li>• Malignant neoplasm of major salivary glands</li> <li>• Malignant neoplasm of connective and other soft tissue</li> </ul> |
| NON HODGKIN'S LYMPHOMA | <ul style="list-style-type: none"> <li>• Lymphosarcoma and reticulosarcoma and other specified malignant tumors of lymphatic tissue</li> <li>• Other malignant neoplasms of lymphoid and histiocytic tissue</li> </ul>                                                                                                                                                                                                                     |

**Supplement Table 2 Age distribution of cancer cases and matched controls**

| Age groups |   | Thyroid  |       | Leukemia |       | NHL      |       |
|------------|---|----------|-------|----------|-------|----------|-------|
|            |   | Controls | Cases | Controls | Cases | Controls | Cases |
| <=35       | n | 34971    | 3463  | 11738    | 1180  | 11672    | 1156  |
|            | % | 90.99    | 9.01  | 90.87    | 9.13  | 90.99    | 9.01  |
| 35<age<=45 | n | 54298    | 5435  | 15133    | 1518  | 18913    | 1887  |
|            | % | 90.9     | 9.1   | 90.88    | 9.12  | 90.93    | 9.07  |
| >45        | n | 139261   | 13955 | 103529   | 10342 | 170976   | 17114 |
|            | % | 90.89    | 9.11  | 90.92    | 9.08  | 90.9     | 9.1   |
| Total      |   | 228530   | 22853 | 130400   | 13040 | 201561   | 20157 |

**NHL: non hodgkin's lymphoma**
